# Supplementary material for: Ionizing Irradiation Not Only Inactivates Clonogenic Potential in Primary Normal Human Diploid Lens Epithelial Cells but Also Stimulates Cell Proliferation in a Subset of This Population
Source: PubMed Central journal article supplement (PMC4026537; doi:10.1371/journal.pone.0098154), 2014-05-19
Supplement: pone.0098154.s008.pdf [file pone.0098154.s008.pdf]

**Table S1.** Number of cells replated per 10-cm dish after irradiation for colony formation.

| Dose (Gy) | Cell types |                   |         |                   | Statistical significance |
|-----------|------------|-------------------|---------|-------------------|--------------------------|
|           | HLEC1      |                   | WI-38   |                   |                          |
| 0         | 300 ±      | 2 <sup>a</sup>    | 302 ±   | 3 <sup>a</sup>    | N.S. <sup>b</sup>        |
| 0.5       | 400 ±      | 4 <sup>a</sup>    | 401 ±   | 4 <sup>a</sup>    | N.S. <sup>b</sup>        |
| 1         | 550 ±      | 2 <sup>a</sup>    | 550 ±   | 1 <sup>a</sup>    | N.S. <sup>b</sup>        |
| 2         | 1099 ±     | 3 <sup>a</sup>    | 1098 ±  | 3 <sup>a</sup>    | N.S. <sup>b</sup>        |
| 4         | 5206 ±     | 10 <sup>a</sup>   | 5194 ±  | 9 <sup>a</sup>    | N.S. <sup>b</sup>        |
| 6         | 14956 ±    | 5202 <sup>a</sup> | 17775 ± | 4100 <sup>a</sup> | N.S. <sup>b</sup>        |

<sup>a</sup>The data represent means and SD of three independent experiments with quadruplicate measurements. <sup>b</sup>Non significant when the number of HLEC1 plated was compared with that of WI-38. *p* values ranged between 0.10 and 0.44.
